# Supplementary material
Source: PubMed Central journal article supplement (PMC3391015)
Supplement: cr201271x1.pdf [file cr201271x1.pdf]

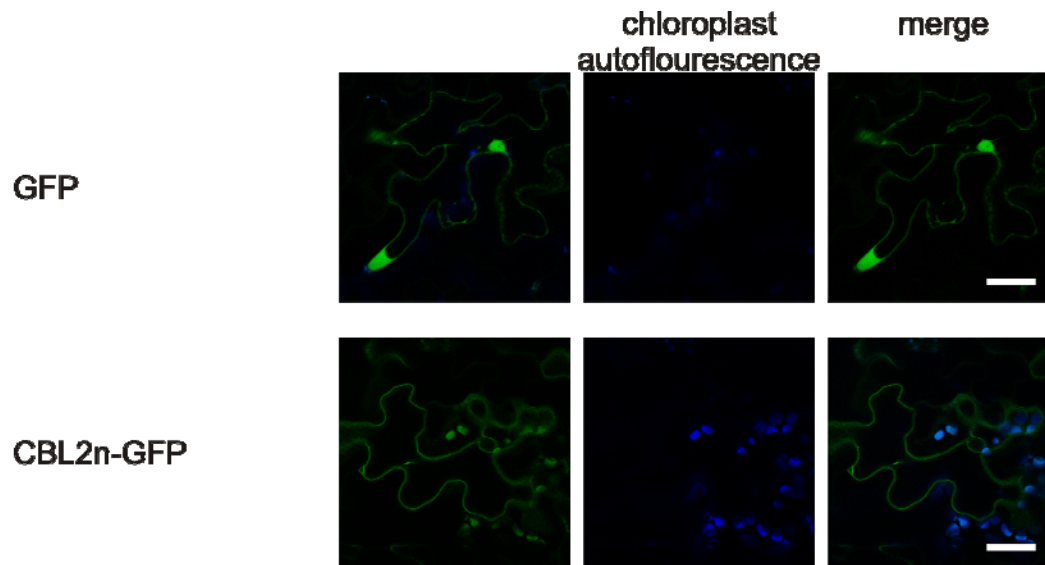

**Supplementary information, Figure S1** GFP and CBL2n-GFP were transiently expressed in *Arabidopsis thaliana* leaves.

While wild type GFP localizes to the cytosol and nucleoplasm, CBL2n-GFP is targeted to the vacuolar membrane. Pictures were taken 4 days after infiltration. Bar represents 20  $\mu\text{m}$ .
