# Supplementary material
Source: PubMed Central journal article supplement (PMC3391015)
Supplement: cr201271x2.pdf [file cr201271x2.pdf]

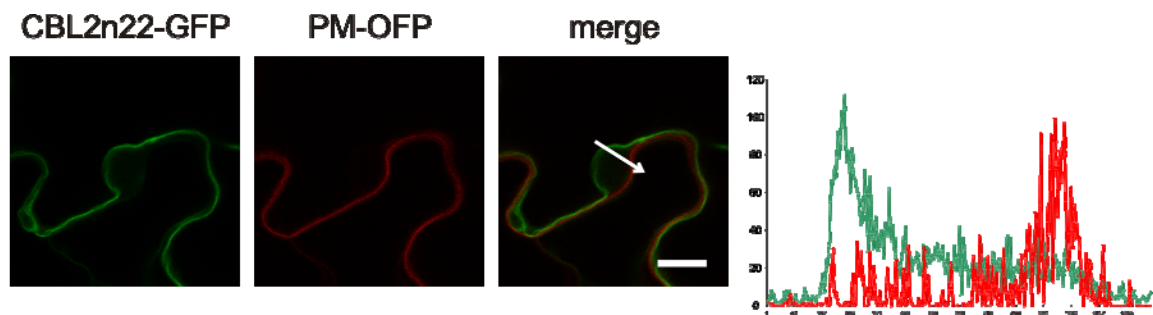

**Supplementary information, Figure S2** Fluorescence distribution of the vacuolar CBL2n22-GFP (the first 22 amino acids from CBL2 fused to the N-terminus of GFP) and of the plasma membrane localized OFP (PM-OFP, 12 amino acids from CBL1 fused to the N-terminus of OFP).

The white arrow represents the region of interest (ROI) from which a distribution of the fluorescence intensity was obtained (according to the direction arrow direction). The distribution of fluorescence is shown in the graph next to the merged picture.
