# Supplementary material
Source: PubMed Central journal article supplement (PMC3391015)
Supplement: cr201271x3.pdf [file cr201271x3.pdf]

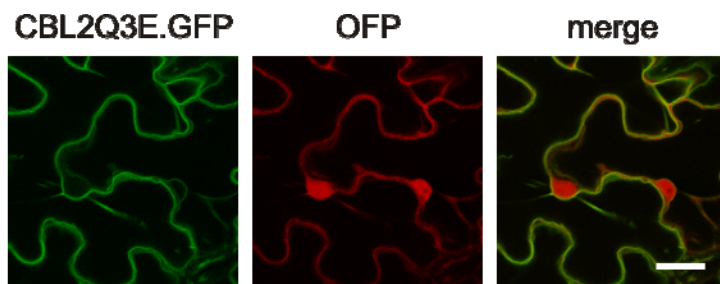

**Supplementary information, Figure S3** Localization of a mutated CBL2 fused to GFP.

The mutation was introduced into the N-terminus of CBL2 where the conserved glutamine at position 3 was exchanged to glutamate. The cytosolic protein OFP was co-expressed and fluorescence distribution was analyzed microscopically. A scale bar in the merged picture represents 20  $\mu\text{m}$ .
