# Supplementary material
Source: PubMed Central journal article supplement (PMC3391015)
Supplement: cr201271x4.pdf [file cr201271x4.pdf]

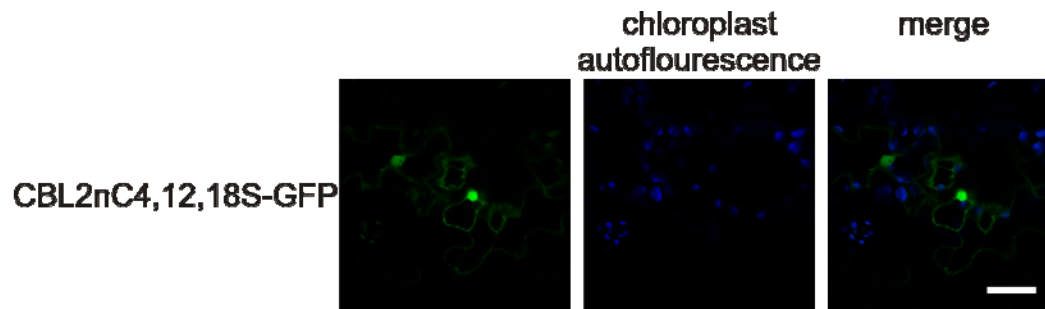

**Supplementary information, Figure S4** CBL2nC4,12,18S-GFP was transiently expressed in *Arabidopsis thaliana* leaves.

The palmitoylation deficient mutant is targeted to the cytosol and nucleoplasm, as the wild type GFP (see Supplementary information, Figure S1). Picture was taken 4 days after infiltration. Bar represents 20  $\mu\text{m}$ .
