# Supplementary material
Source: PubMed Central journal article supplement (PMC3391015)
Supplement: cr201271x5.pdf [file cr201271x5.pdf]

**A)**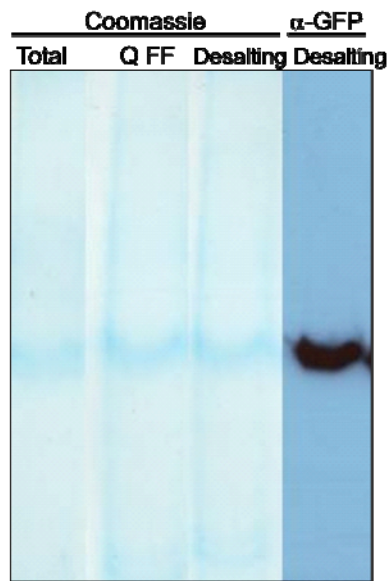**CBL2:GFP****B)**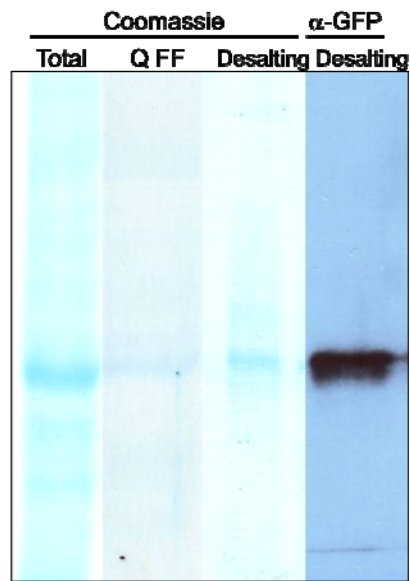**CBL2 C4,12,18S:GFP**

**Supplementary information, Figure S5** Purification of CBL2-GFP and CBL2C4,12,18S-GFP.

SDS-PAGE of CBL2-GFP (A) and CBL2C4,12,18S-GFP (B) before (Total) and after purification by ion exchange chromatography. The degree of protein purification was evaluated by staining gels with Coomassie blue. GFP fusion proteins were identified by immunoblots decorated with anti-GFP antibody (α-GFP).
