# Supplementary material
Source: PubMed Central journal article supplement (PMC3391015)
Supplement: cr201271x6.pdf [file cr201271x6.pdf]

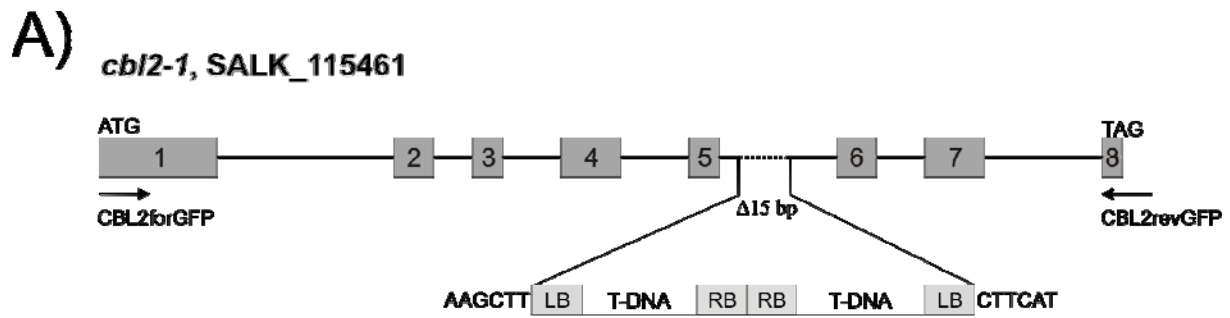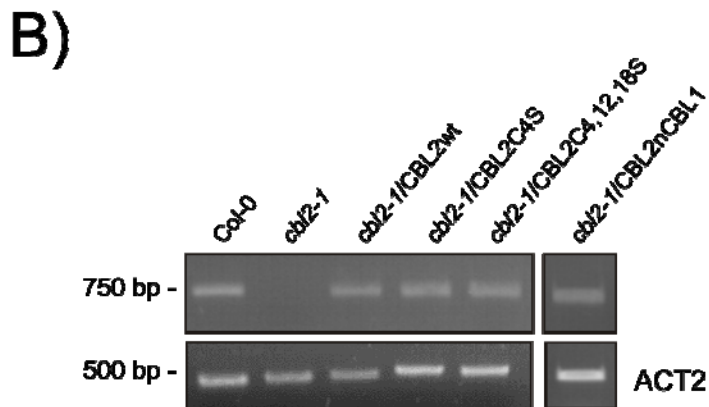

**Supplementary information, Figure S6** T-DNA insertion generates a CBL2 loss of function allele.

(A) Intron-exon structure of the *AtCBL2* gene and location of the T-DNA insertion in the SALK\_115461 line. Gray boxes and connecting lines depict exons and introns. Insertion of T-DNA between nucleotides 843 and 858 in the fifth intron is indicated schematically. Capital letters on each side show the first six nucleotides of each flanking sequence. Location and orientation of primers used in RT-PCR experiments are shown. (B) *ACT2* (*At3g18780*) (lower panel) and *CBL2* (upper panel) transcript levels as determined by RT-PCR in the wildtype (*Col-0*), the *cbi2* mutant (*cbi2-1*) and the complementation lines *cbi2-1/CBL2*, *cbi2-1/CBL2C4S*, *cbi2-1/CBL2C4,12,18S* and *cbi2-1/CBL2nCBL1*.
