# Supplementary material
Source: PubMed Central journal article supplement (PMC3391015)
Supplement: cr201271x7.pdf [file cr201271x7.pdf]

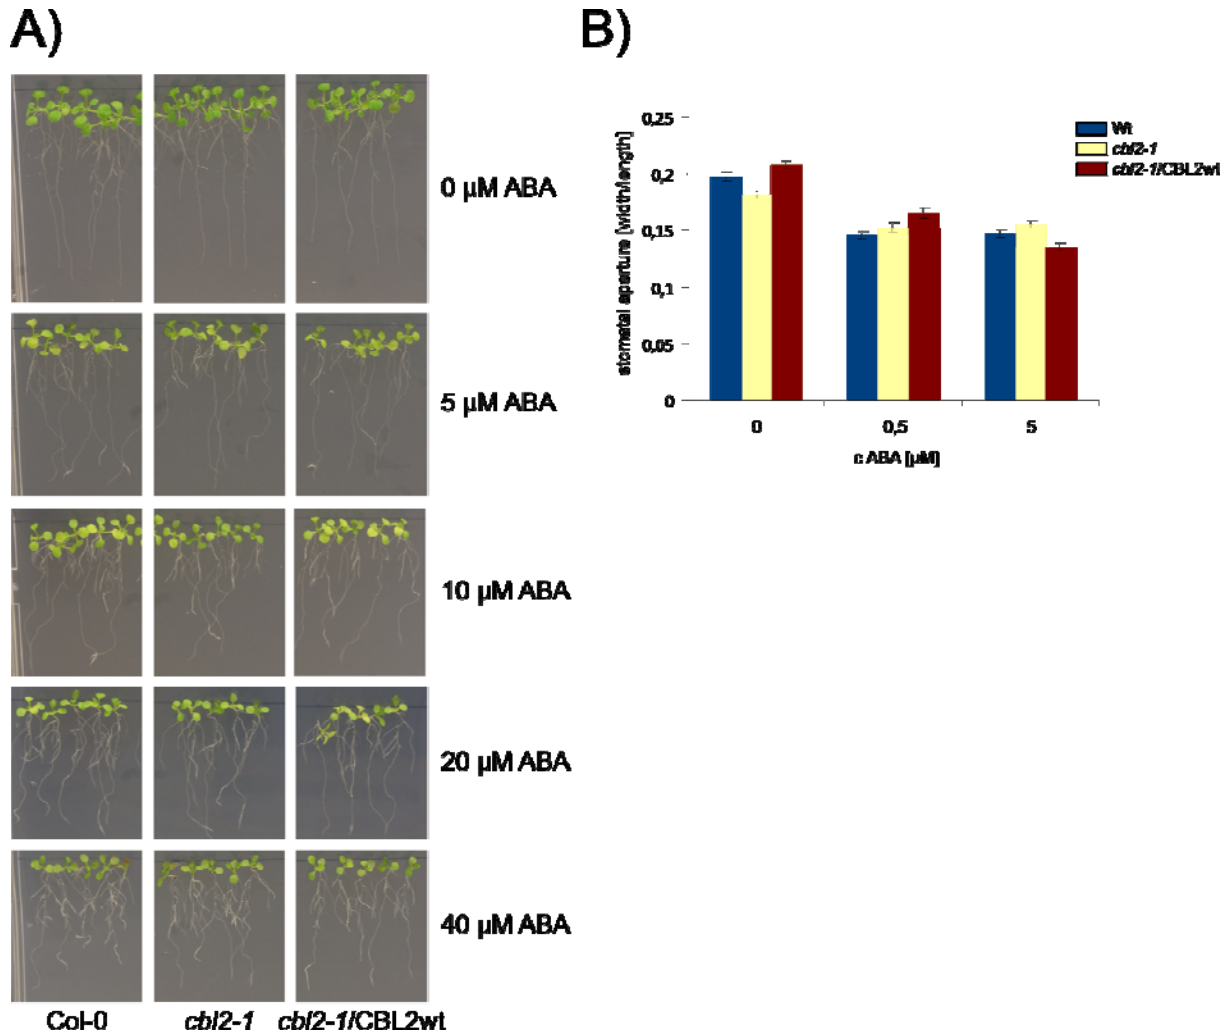

**Supplementary information, Figure S7** ABA bioassays with Col-0 wt, *cb12-1* and *cb12-1/CBL2wt* plants.

(A) 7 days old seedlings were transferred to 0.5 MS plates supplemented with ABA as indicated. Growth of seedlings was recorded after 7 days. No differential growth was observed (B) Response of guard cells to exogenous application of ABA (0.5 and 5  $\mu\text{M}$ ). The ratio of width to length of stomata is shown. No differential response was observed.
