# Supplementary material
Source: PubMed Central journal article supplement (PMC3391015)
Supplement: cr201271x8.pdf [file cr201271x8.pdf]

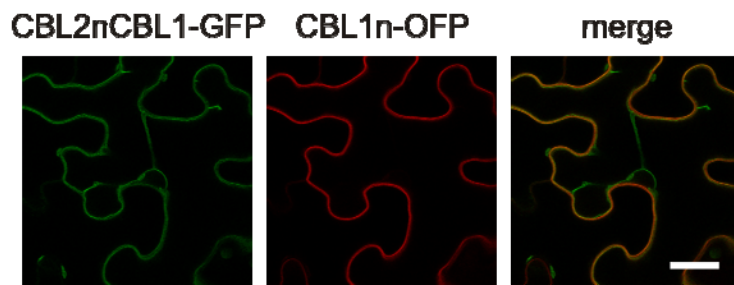

**Supplementary information, Figure S8** Localization of the chimeric CBL1 protein which contains the CBL2n-terminus (CBL2nCBL1-GFP) compared to PM-OFP (see Supplementary information, Figure S2), transiently expressed in *N. benthamiana* leaves.

While PM-OFP is targeted to the plasma membrane, CBL2nCBL1.GFP is targeted to the vacuole. Bar represents 20  $\mu\text{m}$ .
