# Supplementary material
Source: PubMed Central journal article supplement (PMC3391015)
Supplement: cr201271x9.pdf [file cr201271x9.pdf]

**Supplementary information, Table S1 Primers used in this work**

| Name                    | Sequence 5' → 3'                                                                                                                                           | Construct                                 |
|-------------------------|------------------------------------------------------------------------------------------------------------------------------------------------------------|-------------------------------------------|
| CBL2GFPfor              | <u>tttctagagg</u> atcctgaatgtcgcagtcggtga                                                                                                                  | CBL2.GFP<br>CBL2.HA                       |
| CBL2revGFP              | tt <u>cccgggg</u> tatcttcaacctgagaatgg                                                                                                                     |                                           |
| CBL2dntermF             | <u>ttggatcc</u> aaaatgggggtgtttgatcttgattgtat<br>aaa                                                                                                       | CBL2Dn.GFP                                |
| GFPCBL2nterm            | <u>ttggatcctg</u> aaaaatgtcgcagtcggtgacggt<br>atcaagcatttatgcacctctgtttaagtaaagga<br>gaagaactttcacactttcac                                                 | CBL2n16.GFP                               |
| GFPCBL2nterm22aa        | atgtcgcagtcggtgacggtatcaagcattatgc<br>acctctgtttagggtgtttgatctgatagtaaagg<br>agaagaactttcac                                                                | CBL2n22.GFP                               |
| CBL2forC4S              | <u>ttggatcctg</u> aaaaatgtcgcagtcggtgacg                                                                                                                   | CBL2C4S.GFP<br>CBL2C4S.HA<br>CBL2nC4S.GFP |
| CBL2forC12S             | <u>ttggatcctg</u> aaaaatgtcgcagtcggtgacggt<br>atcaagcatttaagcacctctg                                                                                       | CBL2C12S.GFP<br>CBL2C12S.HA               |
| CBL2forC18S             | <u>ttggatcctg</u> aaaaatgtcgcagtcggtgacggt<br>atcaagcatttatgcacctctgtttaggagtttga<br>tc                                                                    | CBL2C18S.GFP<br>CBL2C18S.HA               |
| GFPCBL2nterm22<br>CxxxS | <u>ttggatcctg</u> aaaaatgtcgcagtcggtgacggt<br>atcaagcatttaagcacctctgtttaggagtttg<br>atctgatagtaaaggagaagaactttcac                                          | CBL2nC4,12,18S.GFP                        |
| CBL2Q3Efor              | <u>ttggatcctg</u> aaaaatgtcggagtcggtgacg                                                                                                                   | CBL2Q3E.GFP                               |
| OFPSpforBamHI           | <u>tttggatcc</u> aaaatgaagactaatcttttctttct<br>catctttcactctcctatcattatcctcggccgagtt<br>cgccgcctcctccgaggacg                                               | OFP.TM23                                  |
| OFPTM23rev              | aaaagagctcttaagatcttttctccaacaaat<br>atgcaataagaacaataagaacaagtccagca<br>agagcacctccaactgcaataggaataagagcc<br>tcagcttctctcctcaatagtagaggcgcgggtg<br>gagtgg |                                           |
| CBL2Prom For Hind       | <u>tttaagctt</u> accggtactggattgttcggtat                                                                                                                   | CBL2 promoter                             |
| CBL2Prom Rev Spe        | tt <u>tactagt</u> gatatacttaagcagcaaatcaaaac<br>tct                                                                                                        |                                           |
| GFPforXmal              | ttt <u>cccggg</u> gatgagtaaaggagaagaactttca<br>ct                                                                                                          | GFP (wild type)                           |
| GFPrevSacl              | aaaagagctcttattgtatagttcatccatgcca                                                                                                                         |                                           |
| TPK1_BamF               | <u>ttggatcc</u> atgtcagtgatgcagctc                                                                                                                         | TPK1.GFP                                  |
| TPK1_XhoR               | tt <u>ctcgagc</u> ctttgaatctgagacgtgg                                                                                                                      |                                           |
| Actin2 RT for           | gtaagagacatcaaggagaagctctc                                                                                                                                 | Actin transcript analysis                 |
| Actin2 RT rev           | ggagatccacatctgctggaatg                                                                                                                                    |                                           |

Restriction sites are underlined;
