# Supplementary material
Source: PubMed Central journal article supplement (PMC3391015)
Supplement: cr201271x10.pdf [file cr201271x10.pdf]

**Supplementary information, Table S2** *P*-values from a Students *t*-test

|                          | <b>Wild type</b>   | <b><i>cbI2-1</i></b>     |
|--------------------------|--------------------|--------------------------|
| <b>Wild type</b>         | -                  | 0.00100283               |
| <b><i>cbI2-1</i></b>     | 0.00100283         | -                        |
| <b>2-1/CBL2nCBL1</b>     | 0.00089095         | <b><u>0.13228649</u></b> |
| <b>2-1/CBL2</b>          | <b><u>0.06</u></b> | 0.0008829                |
| <b>2-1/CBL2C4S</b>       | 0.00391891         | <b><u>0.64960587</u></b> |
| <b>2-1/CBL2C4,12,18S</b> | 0.00147072         | <b><u>0.74152106</u></b> |

*P*-values from a Students *t*-test for the germination rates on 5  $\mu$ M ABA of wild type plants, *cbI2-1* knock out plants, and complemented *cbI2-1* lines shown in Figure 5 B of the main text, compared to wild type plants and the *cbI2-1* knock-out line. *P*-values which implicate a non significant difference in germination (*P*-value > 0.5) are underlined and given in bold
